# Supplementary material for: Psychometric validation of the Chinese version of the PaArticular Scales among elderly residents in long-term care facilities with joint contractures
Source: Springer Nature journal article supplement (doi:10.1186/s12877-021-02297-5), 2021-06-09
Supplement: MOESM1 [file 19244004]

## Aktivitätenskala

| Haben Sie Schwierigkeiten, ... |                                                                                                                                                             | Keine<br>(0-4%) | Leichte<br>(5-49%) | Mäßige<br>(50-95%) | Erhebliche<br>(96-100%) |
|--------------------------------|-------------------------------------------------------------------------------------------------------------------------------------------------------------|-----------------|--------------------|--------------------|-------------------------|
|                                |                                                                                                                                                             | Einschränkung   |                    |                    |                         |
| d4103                          | sich hinzusetzen oder aufzustehen?                                                                                                                          | 0               | 1                  | 1                  | 2                       |
| d4104                          | sich hinzustellen und sich dann aus dem Stand wieder hinzulegen oder hinzusetzen?                                                                           | 0               | 1                  | 1                  | 2                       |
| d415                           | so lange zu stehen oder zu sitzen wie es für Sie nötig ist?                                                                                                 | 0               | 1                  | 1                  | 2                       |
| d4154                          | solange stehen zu bleiben, wie es für Sie nötig ist?                                                                                                        | 0               | 1                  | 1                  | 2                       |
| d4200                          | von einer Sitzgelegenheit auf eine andere zu wechseln, ohne dabei ganz aufzustehen?                                                                         | 0               | 1                  | 1                  | 2                       |
| d4201                          | von einem Bett in ein anderes oder auf eine Transportliege zu rutschen?                                                                                     | 0               | 1                  | 1                  | 2                       |
| d430                           | einen Gegenstand anzuheben oder etwas von einem Platz zu einem anderen zu tragen?                                                                           | 0               | 1                  | 1                  | 2                       |
| d440                           | bei der Feinkoordination Ihrer Hände z.B. beim Schreiben, Knöpfe zumachen oder Binden der Schuhe?                                                           | 0               | 1                  | 1                  | 2                       |
| d4400                          | einen kleinen Gegenstand, wie z.B. einen Bleistift mit den Händen und Fingern aufzunehmen oder aufzuheben?                                                  | 0               | 1                  | 1                  | 2                       |
| d4401                          | einen Gegenstand mit beiden Händen zu ergreifen und zu halten, wie z.B. ein Werkzeug?                                                                       | 0               | 1                  | 1                  | 2                       |
| d4402                          | Geld aus einer geöffneten Brieftasche zu entnehmen, um damit in einem Geschäft zu bezahlen?                                                                 | 0               | 1                  | 1                  | 2                       |
| d4403                          | einen Gegenstand absichtlich loszulassen?                                                                                                                   | 0               | 1                  | 1                  | 2                       |
| d4450                          | einen Gegenstand mit Fingern, Händen und Armen zu sich heranzuziehen oder wegzuschieben, wie eine Tür oder Gardine zuzuziehen oder einen Stuhl wegschieben? | 0               | 1                  | 1                  | 2                       |

|       |                                                                                                                                                                     |   |   |   |   |
|-------|---------------------------------------------------------------------------------------------------------------------------------------------------------------------|---|---|---|---|
| d4453 | mit Ihren Fingern, Händen und Armen eine (Wasser)Flasche aufzuschrauben, eine Schürze zu binden oder einen Schlüssel zu drehen?                                     | 0 | 1 | 1 | 2 |
| d4600 | sich zwischen den Zimmern in Ihrer Wohnung und dem anschließenden Gang auf dem gleichen Stockwerk umherzubewegen?                                                   | 0 | 1 | 1 | 2 |
| d4601 | sich innerhalb fremder Gebäude umherzubewegen?                                                                                                                      | 0 | 1 | 1 | 2 |
| d465  | Haben Sie Schwierigkeiten sich selbstständig mit Hilfsmitteln wie Stock, Rollator oder Rollstuhl, sowohl innerhalb als auch außerhalb fortzubewegen?                | 0 | 1 | 1 | 2 |
| d4701 | als Fahrgast ein privates Auto oder ein Taxi zu benutzen?                                                                                                           | 0 | 1 | 1 | 2 |
| d4702 | als Fahrgast ein öffentliches Verkehrsmittel z.B. Bus, Bahn oder Flugzeug zu benutzen?                                                                              | 0 | 1 | 1 | 1 |
| d520  | Ihr Erscheinungsbild zu pflegen und Ihre Körperpflege durchzuführen, wie Haut, Gesicht, Zähne, Kopfhaut, Nägel und Genitalien zu pflegen?                           | 0 | 1 | 1 | 2 |
| d5300 | mit dem Toilettengang (z.B. beim Aufsuchen der Toilette, beim Ausziehen und wieder Anziehen, beim Abwischen oder bei der Benutzung von Inkontinenzhilfsmitteln)?    | 0 | 1 | 1 | 2 |
| d540  | sich selbstständig von Kopf bis Fuß ihre Kleidung (z.B. Entnehmen der Kleidung, Handhabung von Knöpfen und Reißverschlüssen, Schleifen binden) an- und auszuziehen? | 0 | 1 | 1 | 2 |
| d550  | selbstständig zu essen (einschließlich Benutzung von Messer, Gabel, Löffel, sowie Öffnen von Flaschen, Dosen, Verpackungen)?                                        | 0 | 1 | 1 | 2 |
| d570  | selbstständig für ihr Wohlbefinden und ihre Gesundheit zu sorgen (z.B. Medikamentengebrauch, körperliche Aktivität, Arztbesuch)?                                    | 0 | 1 | 1 | 2 |

©Ludwig-Maximilians-Universität München und Martin-Luther-Universität Halle-Wittenberg

## Partizipationsskala

|       |                                                                                                                           | Keine<br>(0-4%) | Leichte<br>(5-49%) | Mäßige<br>(50-95%) | Erhebliche<br>(96-100%) |
|-------|---------------------------------------------------------------------------------------------------------------------------|-----------------|--------------------|--------------------|-------------------------|
|       | Haben Sie Schwierigkeiten, ...                                                                                            | Einschränkung   |                    |                    |                         |
| d660  | hilfsbedürftige Menschen in verschiedenen Bereichen des täglichen Lebens zu unterstützen?                                 | 0               | 1                  | 1                  | 1                       |
| d7105 | in angemessener Weise mit anderen Menschen körperlichen Kontakt aufzunehmen (z.B. jemanden bei der Begrüßung zu umarmen)? | 0               | 1                  | 1                  | 2                       |
| d750  | mit anderen Menschen soziale Kontakte aufzunehmen und zu pflegen?                                                         | 0               | 1                  | 1                  | 2                       |
| d910  | entsprechend Ihren Vorstellungen am gesellschaftlichen Leben teilzunehmen?                                                | 0               | 1                  | 1                  | 2                       |
| d9200 | sich an Spielen (z.B. Kartenspiele, Memory, Brettspiele) zu beteiligen?                                                   | 0               | 1                  | 1                  | 2                       |
| d9201 | sich an Gymnastik und sportlichen Aktivitäten zu beteiligen?                                                              | 0               | 1                  | 1                  | 2                       |
| d9202 | Ihre kulturellen Interessen zu verwirklichen?                                                                             | 0               | 1                  | 1                  | 1                       |
| d9203 | zu basteln/zu handarbeiten?                                                                                               | 0               | 1                  | 1                  | 1                       |
| d9204 | Ihren Hobbies nachzugehen?                                                                                                | 0               | 1                  | 1                  | 2                       |
| d9205 | an geselligen Zusammenkünften teilzunehmen?                                                                               | 0               | 1                  | 1                  | 2                       |
| d930  | Ihre Religiosität auszuüben?                                                                                              | 0               | 1                  | 1                  | 2                       |

©Ludwig-Maximilians-Universität München und Martin-Luther-Universität Halle-Wittenberg
