# Supplementary material for: Psychometric validation of the Chinese version of the PaArticular Scales among elderly residents in long-term care facilities with joint contractures
Source: Springer Nature journal article supplement (doi:10.1186/s12877-021-02297-5), 2021-06-09
Supplement: MOESM2 [file 19244004]

## Activities scale

| Do you have any problems/difficulties, ...                                                                                                                           | No (0-4%) | Mild/moderate (5-49%) | Severe (50-95%) | Full (96-100%) |
|----------------------------------------------------------------------------------------------------------------------------------------------------------------------|-----------|-----------------------|-----------------|----------------|
| Sitting down or standing up?                                                                                                                                         | 0         | 1                     | 1               | 2              |
| Standing up and getting out of a standing position to another position, such as lying down or sitting down?                                                          | 0         | 1                     | 1               | 2              |
| Standing or sitting as long as you need to?                                                                                                                          | 0         | 1                     | 1               | 2              |
| Staying in a standing position for some time as required?                                                                                                            | 0         | 1                     | 1               | 2              |
| Moving from a sitting position on one seat to another seat without standing up completely?                                                                           | 0         | 1                     | 1               | 2              |
| Sliding from one bed to another or to a stretcher for transport?                                                                                                     | 0         | 1                     | 1               | 2              |
| Lifting an object or carrying something from one place to another?                                                                                                   | 0         | 1                     | 1               | 2              |
| With fine coordination of your hands, e.g. writing, buttoning or lacing your shoes?                                                                                  | 0         | 1                     | 1               | 2              |
| Lifting a small object with your hands and fingers, such as picking up a pencil?                                                                                     | 0         | 1                     | 1               | 2              |
| Grasping and holding an object using both hands, e.g. grasping a tool?                                                                                               | 0         | 1                     | 1               | 2              |
| Taking money out of an open purse in order to pay in a shop?                                                                                                         | 0         | 1                     | 1               | 2              |
| Releasing an object on purpose?                                                                                                                                      | 0         | 1                     | 1               | 2              |
| Using fingers, hands and arms to bring an object towards yourself, or move it away from yourself, such as when closing a door or a curtain or pushing a chair aside? | 0         | 1                     | 1               | 2              |

|                                                                                                                                              |   |   |   |   |
|----------------------------------------------------------------------------------------------------------------------------------------------|---|---|---|---|
| Unscrewing a bottle cap or tying an apron or turning a key with your fingers, hands and arms?                                                | 0 | 1 | 1 | 2 |
| Moving around between rooms and the adjacent corridor on the same floor within your home?                                                    | 0 | 1 | 1 | 2 |
| Walking and moving around within unfamiliar buildings?                                                                                       | 0 | 1 | 1 | 2 |
| Moving around using equipment, such as a walking stick, a walker or wheelchair both inside and outside.                                      | 0 | 1 | 1 | 2 |
| Using private car or a taxi as a passenger?                                                                                                  | 0 | 1 | 1 | 2 |
| Using public transportation, such as being passenger on a bus, train or aircraft?                                                            | 0 | 1 | 1 | 1 |
| Maintain your appearance and caring for body parts, such as skin, face, teeth, scalp, nails and genitals?                                    | 0 | 1 | 1 | 2 |
| With toileting (e.g. visiting the bathroom, manipulating clothing before and after, cleaning yourself or using incontinence aids)?           | 0 | 1 | 1 | 2 |
| Putting on and taking off clothes from head to foot without assistance (e.g. picking clothes, doing buttons and zippers, tying a bow)?       | 0 | 1 | 1 | 2 |
| Eating autonomously (including the use of fork, knife, spoon, as well as opening bottles, cans, packages)                                    | 0 | 1 | 1 | 2 |
| Autonomously taking care of your wellbeing and health (e.g. managing daily medications, physical activity, scheduling doctor's appointments) | 0 | 1 | 1 | 2 |

©Ludwig-Maximilians-Universität München and Martin-Luther-Universität Halle-Wittenberg reproduced/translated with kind permission of the copyright owners

## Participation scale

| Do you have any problems/difficulties, ...                                                                       | No<br>(0-4%) | Mild/moderate<br>(5-49%) | Severe<br>(50-95%) | Full<br>(96-100%) |
|------------------------------------------------------------------------------------------------------------------|--------------|--------------------------|--------------------|-------------------|
| Supporting people who need assistance in different areas of daily life?                                          | 0            | 1                        | 1                  | 1                 |
| Bodily contacting others in a contextually and socially appropriate manner (e.g. hugging someone as a greeting)? | 0            | 1                        | 1                  | 2                 |
| Engaging and maintaining social relationships with other people?                                                 | 0            | 1                        | 1                  | 2                 |
| Taking part in community life according to your expectations?                                                    | 0            | 1                        | 1                  | 2                 |
| Participating in games (e.g. playing cards, memory games, board games)?                                          | 0            | 1                        | 1                  | 2                 |
| Participating in exercise and sports?                                                                            | 0            | 1                        | 1                  | 2                 |
| Realizing your cultural interests?                                                                               | 0            | 1                        | 1                  | 1                 |
| Doing handicraft or needlework?                                                                                  | 0            | 1                        | 1                  | 1                 |
| Pursuing your hobbies?                                                                                           | 0            | 1                        | 1                  | 2                 |
| Taking part in social gatherings / getting together with friends or relatives?                                   | 0            | 1                        | 1                  | 2                 |
| Practicing your religion?                                                                                        | 0            | 1                        | 1                  | 2                 |

©Ludwig-Maximilians-Universität München and Martin-Luther-Universität Halle-Wittenberg reproduced/translated with kind permission of the copyright owners
